# Supplementary material for: Efficacy and Toxicity of IMRT-Based Simultaneous Integrated Boost for the Definitive Management of Positive Lymph Nodes in Patients with Cervical Cancer
Source: PubMed Central journal article supplement — J Cancer. 2019 Jan 29;10(5):1103–9. doi: 10.7150/jca.29301 (PMC6400667; doi:10.7150/jca.29301), 2019-01-29
Supplement: jcav10p1103s1.pdf [file jcav10p1103s1.pdf]

## Supporting Information

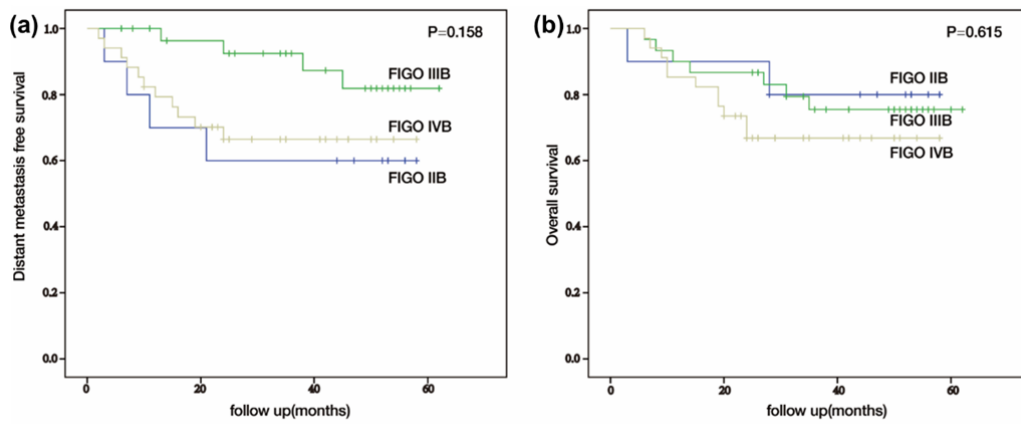

**Figure S1.** Clinical outcomes of intensity-modulated radiotherapy with a simultaneous integrated boost for the definitive management of node-positive cervical cancer. (a) DFS for patients with either stage IIB, IIIB or IVB cervical cancer. (b) OS for patients with either FIGO stage IIB, IIIB or IVB cervical cancer.

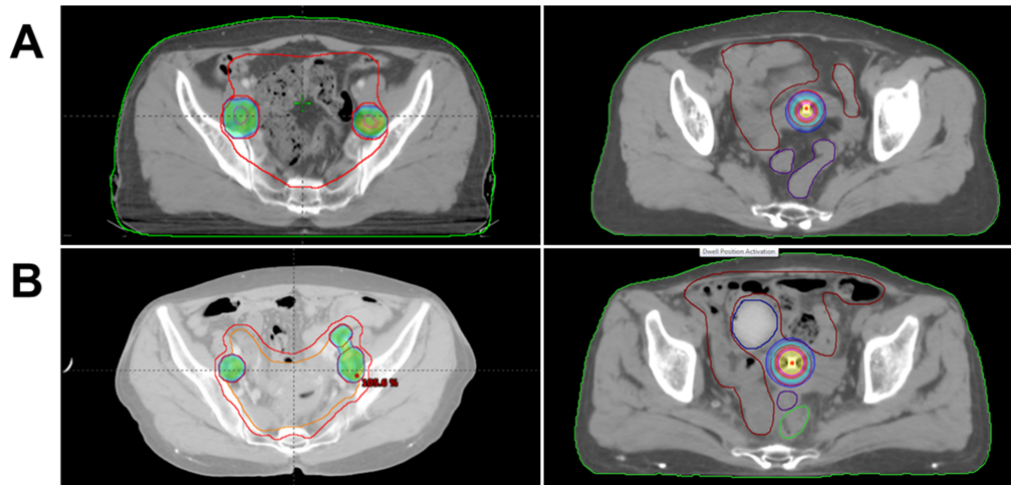

**Figure S2.** Representative arc-based image-guided intensity-modulated radiation therapy (IG-IMRT) and brachytherapy dose distribution in the sample patient. (A) Patient 1, (B) Patient 2.
